# Supplementary material
Source: publisher figshare collection journal article supplement (https://acs.figshare.com/ndownloader/files/4744075)
Supplement: Supplementary file 1 [file 4744075]

## Supporting Information

### Alkyl Chain Barriers for Kinetic Optimization in Dye-Sensitized Solar Cells

Jessica E. Kroeze, Narukuni Hirata, Sara Koops, Md. K. Nazeeruddin, Lukas Schmidt-Mende, Michael Grätzel and James R. Durrant

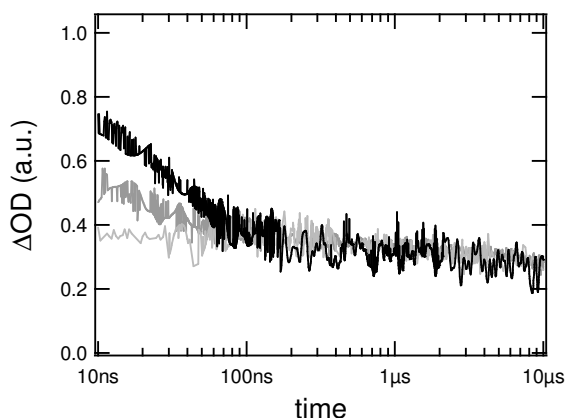

**Figure s1.** Transient absorption data monitoring regeneration of the dye ground state of the **C9** (light gray), **C13** (dark gray) and **C18** (black) dye at 800 nm in complete solid-state device configuration, following 532 nm excitation. The hole conductor matrix was applied by spin-coating from a chlorobenzene solution containing 0.17 M spiro-OMeTAD, 25 mM Li<sup>+</sup>, 0.13 M tBP and 0.3 mM Sb dopant. For the purpose of comparison, the transients have all been normalized to their slow (> 200 ns) tails.

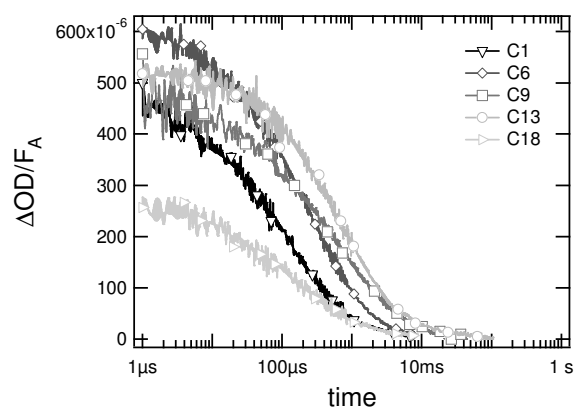

**Figure s2.** Non-normalized transients of Figure 4, monitoring recombination with dye cations (*CRI*) at 800 nm in TiO<sub>2</sub> films sensitized by the **C1-C18** dye series covered in inert solvent. F<sub>A</sub> represents the fraction of incident photons absorbed by the film.

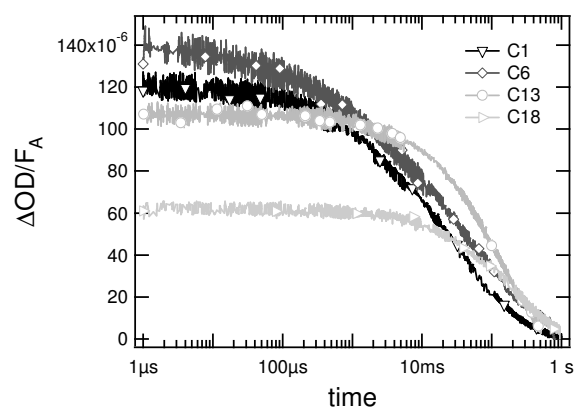

**Figure s3.** Non-normalized transients of Figure 5, monitoring electron recombination to the  $\text{I}^-/\text{I}_3^-$  redox electrolyte at 1000 nm in complete liquid-electrolyte DSSCs employing the **C1-C18** sensitizer dye series.  $F_A$  represents the fraction of incident photons absorbed by the film.
